# Supplementary material for: Use of corticosteroids in influenza-associated acute respiratory distress syndrome and severe pneumonia: a systemic review and meta-analysis
Source: PubMed Central journal article supplement (PMC7033254; doi:10.1038/s41598-020-59732-7), 2020-02-20
Supplement: 41598_2020_59732_MOESM1_ESM.pdf [file 41598_2020_59732_MOESM1_ESM.pdf]

# Use of corticosteroids in influenza-associated acute respiratory distress syndrome and severe pneumonia: a systemic review and meta-analysis

Yuqing Zhou<sup>1</sup>, Xiaofang Fu<sup>1</sup>, Xiaoxiao Liu<sup>1</sup>, Chenyang Huang<sup>1</sup>, Guo Tian<sup>1,2</sup>, Cheng Ding<sup>1</sup>, Jie Wu<sup>1</sup>, Lei Lan<sup>1</sup>, Shigui Yang<sup>1</sup>

<sup>1</sup>State Key Laboratory for Diagnosis and Treatment of Infectious Diseases, Collaborative Innovation Center for Diagnosis and Treatment of Infectious Diseases, National Clinical Research Center for Infectious Diseases, The First Affiliated Hospital, College of Medicine, Zhejiang University, Hangzhou 310003, China

<sup>2</sup>Key Laboratory of Precision Diagnosis and Treatment for Hepatobiliary and Pancreatic Tumor of Zhejiang Province, Hangzhou 310003, China

## 1, Supplementary Figure S1: Meta-analysis of studies reporting crude mortality data.

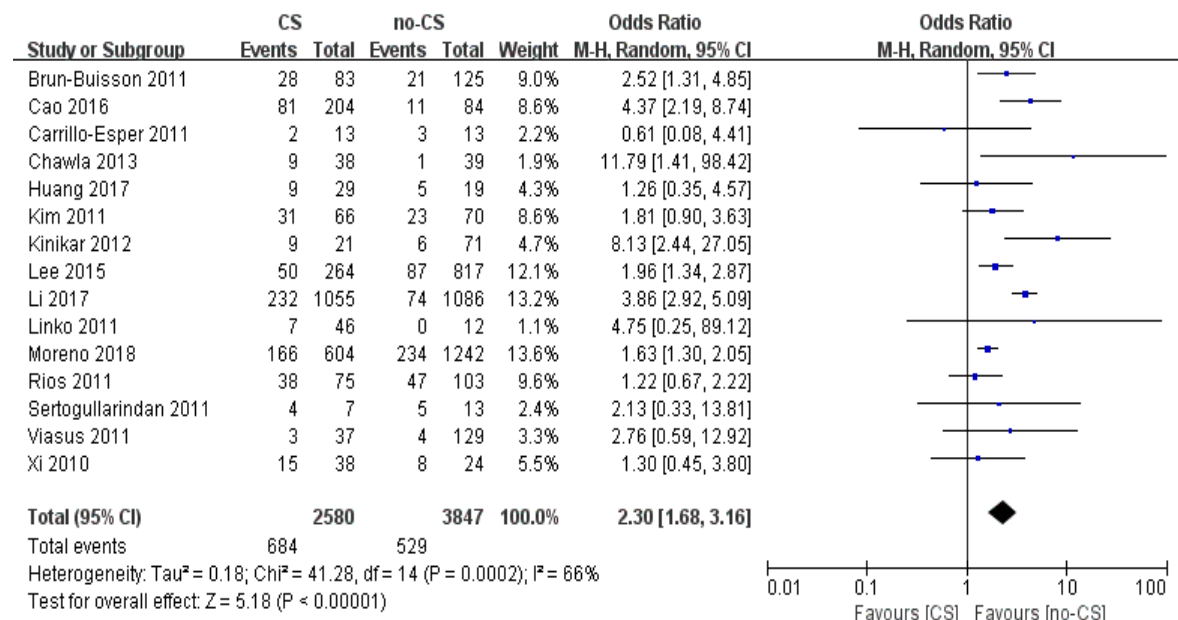

Abbreviations: CI, confidence interval; OR, odds ratio

## 2, Supplementary Figure S2: Funnel plot of studies reporting mortality

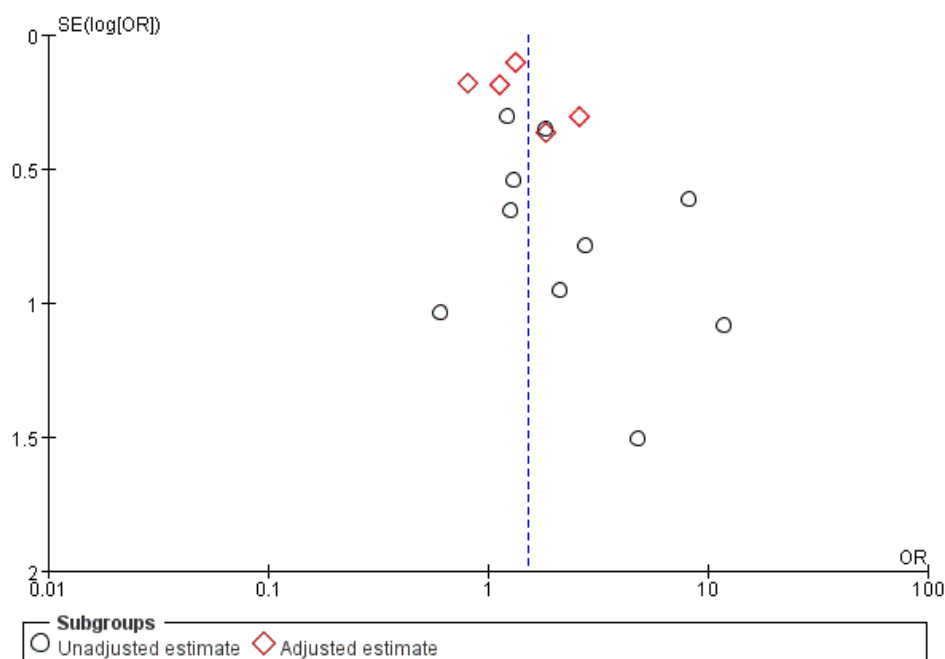

## 3, Supplementary Figure S3: Subgroup analysis of pure ICU patients and mixed patients

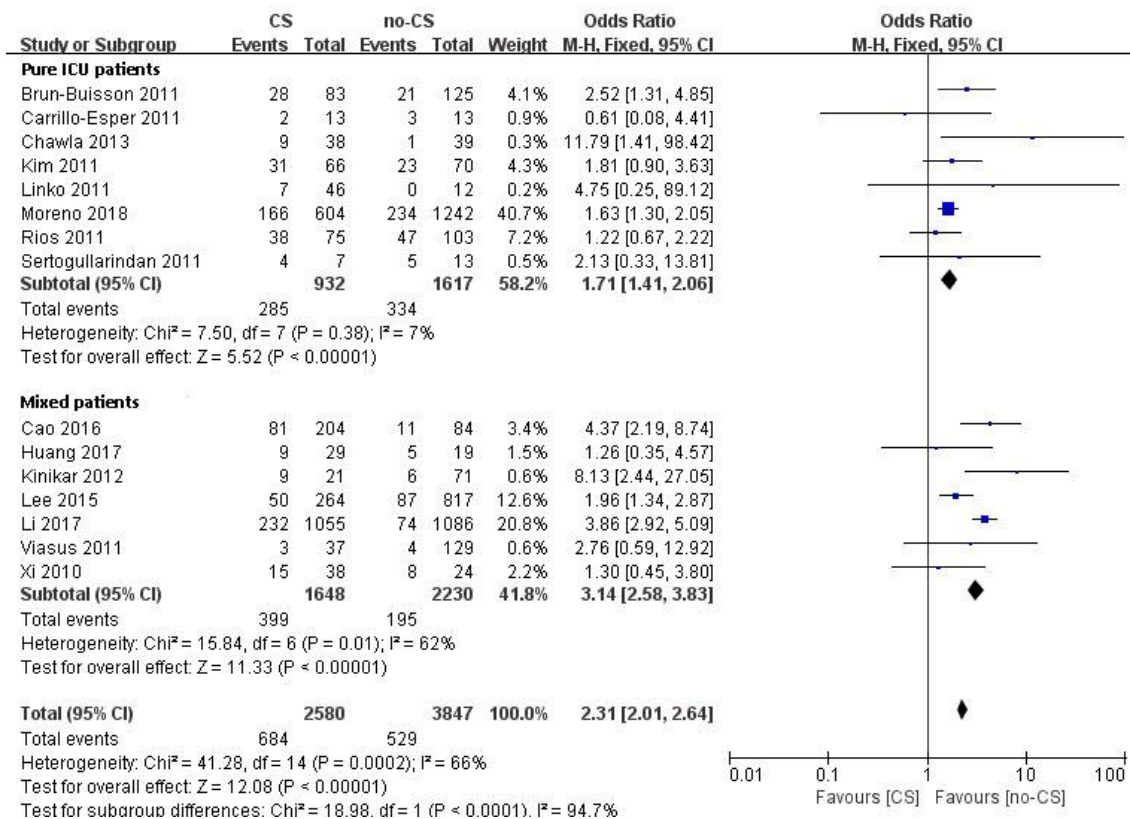

#### 4, Supplementary Table S1: Search strategy on EMBASE

| No. | Query                                                                                                                                                                                                                                                                                                                                                                                                                                                                                    |
|-----|------------------------------------------------------------------------------------------------------------------------------------------------------------------------------------------------------------------------------------------------------------------------------------------------------------------------------------------------------------------------------------------------------------------------------------------------------------------------------------------|
| #16 | #13 AND #14 AND #15                                                                                                                                                                                                                                                                                                                                                                                                                                                                      |
| #15 | #1 OR #10                                                                                                                                                                                                                                                                                                                                                                                                                                                                                |
| #14 | #2 OR #3 OR #4 OR #5 OR #6 OR #7 OR #11                                                                                                                                                                                                                                                                                                                                                                                                                                                  |
| #13 | #8 OR #9 OR #12                                                                                                                                                                                                                                                                                                                                                                                                                                                                          |
| #12 | steroid:ti,ab,kw OR steroid*:ti,ab,kw OR corticosteroid:ti,ab,kw OR corticosteroid*:ti,ab,kw OR corticoid:ti,ab,kw OR corticoid*:ti,ab,kw OR adrenocorticosteroid:ti,ab,kw OR hydrocortisone:ti,ab,kw OR prednisolone:ti,ab,kw OR cortisone:ti,ab,kw OR glucocorticoid:ti,ab,kw OR 'adrenal cortex hormone':ti,ab,kw OR methylprednisolone:ti,ab,kw                                                                                                                                      |
| #11 | pneumonia:ti,ab,kw OR pneumonia*:ti,ab,kw OR pneumonitis:ti,ab,kw OR pneumonitides:ti,ab,kw OR 'pulmonary inflammation*':ti,ab,kw OR 'pulmonary inflammation':ti,ab,kw OR 'shock lung':ti,ab,kw OR ards:ti,ab,kw OR ards:ti,ab,kw OR 'acute respiratory distress syndrome':ti,ab,kw OR 'adult respiratory distress syndrome':ti,ab,kw OR 'acute chest syndrome':ti,ab,kw OR 'respiratory distress syndrome':ti,ab,kw OR 'acute lung injury' OR 'acute respiratory failure' OR ARF OR ALI |
| #10 | 'influenzavirus a':ti,ab,kw OR 'influenzavirus b':ti,ab,kw OR 'influenzavirus c':ti,ab,kw OR influenza:ti,ab,kw OR influenza*:ti,ab,kw OR flu:ti,ab,kw OR flus:ti,ab,kw OR grippe*:ti,ab,kw OR h1n1:ti,ab,kw OR h2n2:ti,ab,kw OR h3n2:ti,ab,kw OR h5n1:ti,ab,kw OR h7n9:ti,ab,kw OR h7n1:ti,ab,kw OR h7n2:ti,ab,kw OR h7n3:ti,ab,kw OR h7n7:ti,ab,kw OR h9n2:ti,ab,kw                                                                                                                    |
| #9  | 'corticosteroid'/exp                                                                                                                                                                                                                                                                                                                                                                                                                                                                     |
| #8  | 'steroid'/exp                                                                                                                                                                                                                                                                                                                                                                                                                                                                            |
| #7  | 'acute respiratory failure'/exp                                                                                                                                                                                                                                                                                                                                                                                                                                                          |
| #6  | 'acute lung injury'/exp                                                                                                                                                                                                                                                                                                                                                                                                                                                                  |
| #5  | 'respiratory distress syndrome'/exp                                                                                                                                                                                                                                                                                                                                                                                                                                                      |
| #4  | 'acute chest syndrome'/exp                                                                                                                                                                                                                                                                                                                                                                                                                                                               |
| #3  | 'adult respiratory distress syndrome'/exp                                                                                                                                                                                                                                                                                                                                                                                                                                                |
| #2  | 'pneumonia'/exp                                                                                                                                                                                                                                                                                                                                                                                                                                                                          |
| #1  | 'influenza'/exp                                                                                                                                                                                                                                                                                                                                                                                                                                                                          |

## 5, Supplementary Table S2: Excluded studies

| Study ID                           | Reason for exclusion                                       |
|------------------------------------|------------------------------------------------------------|
| Diaz <sup>1</sup> 2012             | Overlapping cohort, superseded by later analysis           |
| Perez-Padilla <sup>2</sup> 2009    | Case series                                                |
| Singh <sup>3</sup> 2017            | No useable data relating to patient with pneumonia or ARDS |
| Martin-Loeches <sup>4</sup> 2011   | Overlapping population                                     |
| Sheu <sup>5</sup> 2017             | Conference abstract                                        |
| Marin-Corral <sup>6</sup> 2018     | No useable data relating to patient with pneumonia or ARDS |
| Yeh <sup>7</sup> 2018              | No data on clinical outcomes                               |
| Jung <sup>8</sup> 2011             | Overlapping population                                     |
| Wang <sup>9</sup> 2018             | Overlapping population                                     |
| Mady <sup>10</sup> 2012            | No useable data relating to patient with pneumonia or ARDS |
| Balaganesakumar <sup>11</sup> 2013 | No useable data relating to patient with pneumonia or ARDS |
| Liem <sup>12</sup> 2009            | Only 84% patients with pneumonia                           |
| Delaney <sup>13</sup> 2016         | No useable data relating to patient with pneumonia or ARDS |
| Patel <sup>14</sup> 2013           | Only 68% patients with pneumonia                           |

### References:

- 1 Diaz, E. *et al.* Corticosteroid therapy in patients with primary viral pneumonia due to pandemic (H1N1) 2009 influenza. *Journal of Infection* **64**, 311-318, doi:10.1016/j.jinf.2011.12.010 (2012).
- 2 Perez-Padilla, R. *et al.* Pneumonia and respiratory failure from swine-origin influenza A (H1N1) in Mexico. *New England Journal of Medicine* **361**, 680-689, doi:10.1056/NEJMoa0904252 (2009).
- 3 Singh, A. *et al.* Descriptive Analysis of Mortality Predictors in H1n1 Influenza in South Indian Patients. *Infectious disorders drug targets* **17**, 106-115, doi:10.2174/1871526517666170407155558 (2017).
- 4 Martin-Loeches, I. *et al.* Use of early corticosteroid therapy on ICU admission in patients affected by severe pandemic (H1N1)v influenza A infection. *Intensive care medicine* **37**, 272-283, doi:10.1007/s00134-010-2078-z (2011).
- 5 Sheu, C. C., Chang, W. A., Tsai, M. J., Tsai, J. R. & Chong, I. W. Early Corticosteroid Treatment In Patients With Influenza-Associated Acute Respiratory Distress Syndrome. *American journal of respiratory and critical care medicine* **195** (2017).
- 6 Marin-Corral, J. *et al.* Patients with influenza A (H1N1 )pdm09 admitted to the ICU. Impact of the recommendations of the SEMICYUC. *Medicina intensiva* **42**, 473-481, doi:10.1016/j.medin.2018.02.002 (2018).
- 7 Yeh, C. Y. *et al.* Clinical outcomes and prognostic factors of patients with severe influenza receiving intravenous peramivir salvage therapy in intensive care units. *Journal of microbiology, immunology, and infection = Wei mian yu gan ran za zhi* **51**, 697-704, doi:10.1016/j.jmii.2017.06.001 (2018).
- 8 Jung, J. Y. *et al.* Acute kidney injury in critically ill patients with pandemic influenza A pneumonia 2009 in Korea: A multicenter study. *Journal of critical care* **26**, 577-585,

- doi:10.1016/j.jcrc.2011.02.012 (2011).
- 9 Wang, Y. *et al.* Factors Associated With Prolonged Viral Shedding in Patients With Avian Influenza A(H7N9) Virus Infection. *Journal of Infectious Diseases* **217**, 1708-1717, doi:10.1093/infdis/jiy115 (2018).
- 10 Mady, A. *et al.* Clinical experience with severe 2009 H1N1 influenza in the intensive care unit at King Saud Medical City, Saudi Arabia. *Journal of infection and public health* **5**, 52-56, doi:10.1016/j.jiph.2011.10.005 (2012).
- 11 Brun-Buisson, C., Richard, J. C., Mercat, A., Thiebaut, A. C. & Brochard, L. Early corticosteroids in severe influenza A/H1N1 pneumonia and acute respiratory distress syndrome. *American journal of respiratory and critical care medicine* **183**, 1200-1206, doi:10.1164/rccm.201101-0135OC (2011).
- 12 Liem, N. T. *et al.* Clinical features of human influenza a (H5N1) infection in vietnam: 2004-2006. *Clinical Infectious Diseases* **48**, 1639-1646, doi:10.1086/599031 (2009).
- 13 Delaney, J. W. *et al.* The influence of corticosteroid treatment on the outcome of influenza A(H1N1pdm09)-related critical illness. *Critical Care* **20**, doi:10.1186/s13054-016-1230-8 (2016).
- 14 Patel, K. K. *et al.* Clinical Outcome of Novel H1N1 (Swine Flu)-Infected Patients During 2009 Pandemic at Tertiary Referral Hospital in Western India. *Journal of global infectious diseases* **5**, 93-97, doi:10.4103/0974-777x.116868 (2013).

**6, Supplementary Table S3: Characteristics of the cohorts assessed in the included studies**

| Study,<br>Year                                 | Participants |                                                                                                                                                 |                                                                   |                                                                                                                                                   |                                                                                                                                                                                                                                                                                                                  | Disease severity score                                                                                        | Outcome(s)                                                                                  |
|------------------------------------------------|--------------|-------------------------------------------------------------------------------------------------------------------------------------------------|-------------------------------------------------------------------|---------------------------------------------------------------------------------------------------------------------------------------------------|------------------------------------------------------------------------------------------------------------------------------------------------------------------------------------------------------------------------------------------------------------------------------------------------------------------|---------------------------------------------------------------------------------------------------------------|---------------------------------------------------------------------------------------------|
|                                                | CS/no-CS     | Age                                                                                                                                             | Male Sex                                                          | BMI                                                                                                                                               | Comorbidities                                                                                                                                                                                                                                                                                                    |                                                                                                               |                                                                                             |
| Studies included in meta-analysis of mortality |              |                                                                                                                                                 |                                                                   |                                                                                                                                                   |                                                                                                                                                                                                                                                                                                                  |                                                                                                               |                                                                                             |
| Brun-Buisson 2011 (France)                     | 83/125       | Median age (IQR),<br>All:<br>47.0 (35.0-55.0)<br>CS:<br>49.0 (34.0-56.0);<br>no-CS:<br>45.0 (35.0-55.0)                                         | All: 105/208<br>CS: 36/83;<br>no-CS: 69/125                       | Median (IQR),<br>All: 28.0 (24.0-33.0)<br>CS: 29.0 (24.0-33.0)<br>no-CS: 27.0 (23.0-33.0)<br>BMI >=30:<br>All: 86/208, CS: 34/83<br>no-CS: 52/125 | Immunodepression: 41/208 in all patients, 23/125 in no-CS group, 18/82 in CS group; Diabetes: 27/208, 20/125, 7/83; Pregnancy or postpartum: 14/208, 9/125, 5/83; Chronic liver disease, alcohol abuse: 14/208, 8/125, 6/83; Chronic renal failure :3/208, 2/125, 1/83; Neuromuscular disease: 6/208,4/125, 2/83 | SAPS III, Median (IQR):<br>All: 52.0 (44.0-64.0);<br>CS: 51.0 (44.0-61.0);<br>no-CS: 53.0 (46.0-66.0); p>0.05 | Mortality, ICU-acquired infection, duration of MV, length of ICU stay, Ventilator-free days |
| Carrillo-Esper 2011 (Mexico)                   | 13/13        | Mean ± SD,<br>All: 52.3 ± 15.5;<br>Survivor: 53.6 ±14.9;<br>Death: 46.6 ± 18.4                                                                  | All: 16/26<br>Survivor: 13/21<br>Death: 3/5                       | Mean ± SD;<br>All: 28.8 ± 4.1<br>Survivor: 28.8 ± 4.2<br>Death: 28.7 ± 4.2                                                                        | Diabetes:6/26; 9/26 high blood pressure; cardiovascular disease: 4/26;                                                                                                                                                                                                                                           | APACHE II, Mean ± SD, 13.1±6.4;<br>SOFA, Mean ±SD, 6.4±3.4                                                    | Mortality                                                                                   |
| Xi 2010                                        | 38/24        | Not reported                                                                                                                                    | Not reported                                                      | Not reported                                                                                                                                      | Not reported                                                                                                                                                                                                                                                                                                     | Not reported                                                                                                  | Mortality                                                                                   |
| Cao 2016 (China)                               | 204/84       | Median age (IQR):<br>All: 58.0 (45.0-68.0)<br>Low-dose CS:<br>59.0 (49.3-68.0)<br>high-dose CS:<br>57.5 (46.5-68.8)<br>no- CS: 55.0 (38.3-67.0) | low-dose CS:<br>118/168<br>high-dose CS:<br>28/36<br>no-CS: 55/84 | Not reported                                                                                                                                      | Hypertension: 74/168, 13/26, 26/84; Heart disease:18/168, 2/36, 11/84;<br>Diabetes:36/168, 6/36, 9/84; COPD or Asthma: 6/168, 5/26, 3/84; Chronic renal insufficiency: 5/168, 1/36, 3/84; Immunosuppressed: 0/168, 0/36, 3/84; Pregnancy: 3/168 1/26, 2/84                                                       | Not reported                                                                                                  | 30d,60d-Mortality;<br>Nosocomial infections; Viral shedding                                 |

|                                   |               |                                                                                                  |                                                   |                                                                                                                                   |                                                                                                                                                                                                                                                                                                                                                                                                       |                                                                                                                                                                                        |                                                                                             |
|-----------------------------------|---------------|--------------------------------------------------------------------------------------------------|---------------------------------------------------|-----------------------------------------------------------------------------------------------------------------------------------|-------------------------------------------------------------------------------------------------------------------------------------------------------------------------------------------------------------------------------------------------------------------------------------------------------------------------------------------------------------------------------------------------------|----------------------------------------------------------------------------------------------------------------------------------------------------------------------------------------|---------------------------------------------------------------------------------------------|
| Kim 2011<br>(Korea)               | 66/70         | Not reported                                                                                     | Not reported                                      | Not reported                                                                                                                      | Not reported                                                                                                                                                                                                                                                                                                                                                                                          | Not reported                                                                                                                                                                           | 14d, 30d,90d-<br>Mortality                                                                  |
| Rios 2011<br>(Argentina)          | 75/103        | Mean $\pm$ SD,<br>All: 44.0 $\pm$ 15.0<br>Survivor: 45.0 $\pm$<br>16.0<br>Death: 43.0 $\pm$ 15.0 | All: 98/178<br>Survivor:<br>49/93<br>Death: 49/85 | All: 28 $\pm$ 8<br>Survivor: 28 $\pm$ 6 Death:<br>29 $\pm$ 10<br>BMI $\geq$ 30:<br>All: 46/178,<br>Survivor:17/93<br>Death: 29/85 | BMI $\geq$ 30: 46/178 in all patients, 17/93 in<br>survived group and 29/85 in deceased group;<br>BMI:28 $\pm$ 8 in all patients, 28 $\pm$ 6 in survivors, 29<br>$\pm$ 10 in deceased; COPD 28/178 in all patients<br>16/93 in survivors, 12/85 in deceased,Asthma<br>10/178 in all patients 6/93 in survivors, 4/85 in<br>deceased; diabetes, 16/178,<br>Immunosuppression,29/178; Pregnancy 16/178, | APACHE II, Mean $\pm$ SD,<br>All: 18.0 $\pm$ 7.0<br>Survivor:17.0 $\pm$ 6.0<br>Death: 20.0 $\pm$ 7.0<br>SOFA,<br>All: 4.0 (5.0-8.0)<br>Survivor: 3.0 (5.0-7.0)<br>Death: 6.0 (4.0-8.0) | Mortality                                                                                   |
| Lee 2015<br>(China,<br>Singapore) | 264/817       | Not reported                                                                                     | Not reported                                      | Not reported                                                                                                                      | Not reported                                                                                                                                                                                                                                                                                                                                                                                          | NA                                                                                                                                                                                     | Mortality                                                                                   |
| Linko 2011<br>(Finland)           | 46/12         | Median (IQR),<br>CS:<br>51.0 (40.0-56.0);<br>no-CS:<br>50.0 (44.0-57.0)                          | CS: 29/46<br>no-CS: 8/12                          | BMI >35:<br>CS: 11/46<br>No-CS: 4/12                                                                                              | Chronic obstructive pulmonary disease: 1/12 in<br>no-CS group, 3/46 in CS group; Ischemic cardiac<br>disease: 1/12, 6/46; Pregnancy 0/12, 1/46;<br>BMI >35, 4/12, 11/46                                                                                                                                                                                                                               | SAPS II, Median (IQR),<br>CS: 32.0 (22.0-37.0)<br>no-CS: 26.0 (17.0-<br>30.0), p<0.05; SOFA,<br>no-CS:4.0 (0-7.0)<br>CS:7.0(4.0-90), p<0.05                                            | ICU mortality,<br>length of stay,<br>Hospital Mortality,<br>length of stay,<br>Length of MV |
| Li 2017<br>(China)                | 1055/<br>1086 | Median: 34.4                                                                                     | CS: 530/1055<br>no-CS:<br>565/1086                | Not reported                                                                                                                      | Immunosuppressive conditions: 34/1055 in CS,<br>15/1084 in no-CS; Hypertension: 158/1055,<br>168/1086; Diabetes:78/1055, 90/1086;<br>Cardiovascular disease: 56/1055, 75/1086; COPD<br>or Asthma: 81/1055, 63/1086; Chronic renal<br>disease:36/1055, 38/1086                                                                                                                                         | Not reported                                                                                                                                                                           | Mortality,<br>Nosocomial<br>infection                                                       |

|                                        |          |                                                                           |                                                        |                                                                     |                                                                                                                                                                                                                                                                                                 |                                                                                                                                                    |                                                                                     |
|----------------------------------------|----------|---------------------------------------------------------------------------|--------------------------------------------------------|---------------------------------------------------------------------|-------------------------------------------------------------------------------------------------------------------------------------------------------------------------------------------------------------------------------------------------------------------------------------------------|----------------------------------------------------------------------------------------------------------------------------------------------------|-------------------------------------------------------------------------------------|
| Huang 2017<br>(Taiwan/<br>China)       | 29/19    | Median: 60.1                                                              | 30/48                                                  | BMI > 30: 1/48                                                      | Immunocompromised: 16/48; Malignancy: 9/48;<br>Chronic lung disease: 13/48; Diabetes: 22/48                                                                                                                                                                                                     | Not reported                                                                                                                                       | Mortality, Length<br>of Stay                                                        |
| Sertogullari-<br>ndan 2011<br>(Turkey) | 7/13     | Mean±SD (range),<br>36.0±2.8 (15.0-<br>72.0)                              | 10/20                                                  | BMI>30: 1/20                                                        | Cardiac disorder:4/20; COPD: 2/20; Renal<br>diseases: 2/20                                                                                                                                                                                                                                      | Not reported                                                                                                                                       | Mortality                                                                           |
| Viasus 2011<br>(Spain)                 | 37/129   | Median (IQR),<br>CS: 44.0 (35.0-<br>53.0);<br>no-CS: 35.0 (28.0-<br>47.0) | CS: 15/37<br>no-CS: 61/129                             | Not reported                                                        | Chronic pulmonary disease:22/129 in no-CS<br>group, 17/27 in CS group; Diabetes:8/129 in no-<br>CS group, 5/37 inn CS group; chronic heart<br>disease:8/129, 3/37                                                                                                                               | high risk PSI classes,<br>CS: 8/37<br>no-CS: 8/129<br>P <0.05                                                                                      | In-hospital<br>mortality, Time to<br>clinical stability,<br>Nosocomial<br>infection |
| Moreno<br>2018<br>(Spain)              | 604/1242 | Median (IQR),<br>CS: 53.0 (41.0-62.0)<br>no-CS: 51.0 (39.0-<br>61.0)      | All:<br>1096/1846<br>CS: 357/604<br>no-CS:<br>739/1242 | BMI>30:<br>All: 608/1846<br>CS:221/604<br>no-CS: 387/1242<br>P<0.05 | Asthma: 79/604 in CS, 75/1242 in no-CS P<0.05;<br>COPD: 154/604 in CS, 178/1242 in no-CS<br>P<0.05; chronic heart disease: 56/604, 126/1242,<br>P>0.05; chronic renal disease: 53/604 in-CS,<br>98/1242 in no-CS P>0.05; Hematological disease<br>65/604 in CS, 68/1242 in no-CS group, p=0.001 | APACHE II score,<br>median (IQR),<br>CS: 15 (10-20)<br>no-CS: 14 (10-19)<br>p=0.004;<br>SOFA, median (IQR)<br>CS: 5 (4-8),<br>no-CS:5(3-8), p=0.33 | ICU mortality, ICU<br>length of stay,<br>length of MV                               |
| Chawla<br>2013(India)                  | 38/39    | Mean± SD (IQR),<br>40.9 ±13.5 (10.0-<br>72.0)                             | 44/77                                                  | Not reported                                                        | Diabetes:15/77; Hypertension: 14/77<br>Asthma:13/77 Coronary Artery Disease: 5/7 ,<br>Hypothyroidism 4/77 immunosuppressants:6/77,<br>peripartum:3/77                                                                                                                                           | Not reported                                                                                                                                       | Mortality                                                                           |
| Kinikar<br>2012(India)                 | 21/71    | Median (IQR),<br>2.5 (1.3-6.0)                                            | 43/92                                                  | Not reported                                                        | Asthma:4/71                                                                                                                                                                                                                                                                                     | Not reported                                                                                                                                       | Mortality                                                                           |



| Studies not included in meta-analysis of mortality but other outcomes |       |                                               |                          |               |                                                                                                                                                                                                    |                                     |                                                                                 |
|-----------------------------------------------------------------------|-------|-----------------------------------------------|--------------------------|---------------|----------------------------------------------------------------------------------------------------------------------------------------------------------------------------------------------------|-------------------------------------|---------------------------------------------------------------------------------|
| Kudo 2012<br>(Japan)                                                  | 46/12 | Median (IQR),<br>8.0 (0-71.0)                 | 26/58                    | NA            | Asthma:18/58                                                                                                                                                                                       | Not reported                        | Hours to alleviation<br>of fever after<br>admission;<br>Hospitalization<br>days |
| Wirz 2016<br>(Switzerland)                                            | 11/13 | NA                                            | NA                       | NA            | NA                                                                                                                                                                                                 | NA                                  | Time to clinical<br>stability, length of<br>stay                                |
| Kil 2011<br>(South<br>Korea)                                          | 17/15 | Mean±SD,<br>CS: 6.6 ± 1.5;<br>no-CS:7.8 ± 3.4 | CS:13/17<br>no-CS: 12/15 | NA            | NA                                                                                                                                                                                                 | NA                                  | Duration of fever,<br>length of stay                                            |
| Chien 2010<br>(Taiwan/<br>China)                                      | 21/75 | Median (IQR),<br>18 (0.7-73.0)                | Male sex: 61/96          | BMI>30: 22/96 | obesity:22/96; Diabetes: 9/96; Neurodevelopment<br>diseases:12/96; Chronic pulmonary<br>disease:11/96; cardiovascular disease:9/96;<br>chronic renal insufficiency 4/96;<br>immunosuppression 4/96 | SOFA score CS vs no-<br>CS, p< 0.05 | Nosocomial<br>infection                                                         |

Abbreviations: APACHE, Acute Physiology and Chronic Health Evaluation; COPD, chronic observation pulmonary disease; CS, corticosteroid therapy; Eq, equivalent; ICU, intensive care unit; IQR, interquartile range; methypred, methylprednisolone, MV, mechanical ventilation; PSI, pneumonia severity index; SAPS, Simplified Acute Physiology Score; SD, standard deviation; SOFA, Sequential Organ Failure Assessment.

**7, Supplementary Table S4a: Risk of bias in the included observational studies, as determined using the Newcastle-Ottawa Scale**

| Study                  | A. Selection                           |                           |                           |                              | B. Comparability of cohorts | C. Outcome             |                        |                       |
|------------------------|----------------------------------------|---------------------------|---------------------------|------------------------------|-----------------------------|------------------------|------------------------|-----------------------|
|                        | Represent-activeness of exposed cohort | Selection of non-exposure | Ascertainment of exposure | Outcome not present at start |                             | Assessment of exposure | Follow-up long enough? | Adequacy of follow-up |
| Brun-Buisson 2011      | *                                      | *                         | *                         | *                            | **                          | *                      |                        | *                     |
| Cao 2016               | *                                      | *                         | *                         | *                            | **                          | *                      | *                      | *                     |
| Moreno 2018            | *                                      | *                         | *                         | *                            | **                          | *                      |                        | *                     |
| Li 2017                | *                                      | *                         | *                         | *                            | **                          | *                      | *                      | *                     |
| Kim 2011               | *                                      | *                         | *                         | *                            | **                          | *                      | *                      | *                     |
| Lee 2015               | *                                      | *                         | *                         | *                            | *                           | *                      | *                      | *                     |
| Viasus 2011            | *                                      | *                         | *                         | *                            | **                          | *                      | *                      | *                     |
| Rios 2011              | *                                      | *                         | *                         | *                            | **                          | *                      | *                      | *                     |
| Carrillo-Esper 2011    | *                                      | *                         | *                         | *                            |                             | *                      |                        | *                     |
| Linko 2011             | *                                      | *                         | *                         | *                            |                             | *                      |                        | *                     |
| Huang 2017             | *                                      | *                         | *                         | *                            |                             | *                      |                        | *                     |
| Sertogullari-ndan 2011 | *                                      | *                         | *                         | *                            |                             | *                      |                        | *                     |
| Xi 2010                | *                                      | *                         | *                         | *                            |                             | *                      |                        | *                     |
| Chawla 2013            | *                                      | *                         | *                         | *                            |                             | *                      |                        | *                     |
| Kinikar 2012           | *                                      | *                         | *                         | *                            |                             | *                      |                        | *                     |
| Kudo 2012              | *                                      | *                         | *                         | *                            |                             | *                      |                        | *                     |
| Kil 2011               | *                                      | *                         | *                         | *                            |                             | *                      |                        | *                     |
| Chien 2010             | *                                      | *                         | *                         | *                            |                             | *                      |                        | *                     |

**Supplementary Table S4b: Risk of bias in the included RCTs, as determined using Cochrane Risk of Bias tool**

| Study     | Random sequence generation              | Allocation concealment      | Blinding of participants and personnel | Blinding of outcome assessors                                                   | Incomplete outcome data                                                                                     | Selective outcome reporting             | Other bias                                                                                                                                                  |
|-----------|-----------------------------------------|-----------------------------|----------------------------------------|---------------------------------------------------------------------------------|-------------------------------------------------------------------------------------------------------------|-----------------------------------------|-------------------------------------------------------------------------------------------------------------------------------------------------------------|
| Wirz 2016 | LOW<br>Restricted randomization process | LOW<br>Allocation concealed | LOW<br>Double blind                    | LOW<br>Investigators who analyzed the data were masked to treatment allocation. | HIGH<br>Outcomes were assessed from a very much smaller "randomly selected subsample" of total participants | UNCLEAR<br>Trial protocol not available | UNCLEAR. Original cluster-randomization process might have been OK but these outcomes was assessed in a small "randomly selected subsample" of individuals. |

### 8, Supplementary Table S5: Mortality of ARDS in included studies

| Study ID             | Setting                        | Participants number                         | Event/<br>total CS | Event/<br>total no-CS | Adjusted estimate      |
|----------------------|--------------------------------|---------------------------------------------|--------------------|-----------------------|------------------------|
| Brun-Buisson<br>2011 | ICU; ARDS;<br>H1N1             | All (n=208)                                 | 28/83              | 21/125                | aHR, 2.59 (1.42-4.37)  |
| Li 2017              | Inhospita;l; ARDS;<br>H1N1     | All (n=1160)                                | 215/760            | 62/400                | aHR, 0.67 (0.46-0.98)  |
|                      |                                | Low-to-moderate dose vs no-<br>CS (n = 836) | 99/436             | 62/400                | aHR, 0.49 (0.32-0.77)  |
|                      |                                | High-dose vs no-CS (n= 712)                 | 111/312            | 62/400                | aHR, 0.88 (0.56-1.39)  |
| Cao 2016             | Inhospita;l; ARDS;<br>H7N9     | All (n=207)                                 |                    |                       | aHR, 1.85 (0.87-3.93)  |
|                      |                                | Low-to-moderate dose vs no-<br>CS (n = 176) |                    |                       | aHR, 1.69 (0.78-3.64); |
|                      |                                | High-dose vs no-CS (n = 76)                 |                    |                       | aHR, 2.89 (1.10-7.56)  |
| Kim 2011             | ICU; ARDS;<br>H1N1             | All (n=136)                                 | 38/66              | 25/70                 | aOR, 1.80 (0.69-4.70)  |
| Xi 2010              | Inhospita;l; ARDS;<br>H1N1     | All(n=62)                                   | 15/38              | 8/24                  |                        |
|                      |                                | Low-to-moderate dose vs no-<br>CS (n = 43)  | 8/19               | 8/24                  |                        |
|                      |                                | High dose vs no-CS (n =43)                  | 7/19               | 8/24                  |                        |
| Huang 2017           | Inhospita;l; ARDS;<br>Type A/B | All (n=48)                                  | 9/29               | 5/19                  |                        |
| Chawla 2013          | ICU; ARDS;<br>H1N1             | All (n=77)                                  | 9/38               | 1/39                  |                        |
| Linko 2011           | ICU; ARDS;<br>H1N1             | All (n=58)                                  | 7/46               | 0/12                  |                        |
